# Supplementary material
Source: HighWire-hosted journal article supplement (https://cmaj.ca/highwire/filestream/58727/field_highwire_adjunct_files/0/what-kanani-1-at.pdf)

**Appendix 1: Photomicrograph from a bone marrow biopsy in a 15-year-old girl with severe iron-deficiency anemia showing cellularity of about 70% (hematoxylin–eosin, original magnification × 1000). Megakaryocytes are present but in mildly reduced numbers. Erythroid precursors are reduced with erythroid islands noted. All stages of granulopoiesis are present. There is no clear morphological evidence of increased blasts or malignant infiltration.**

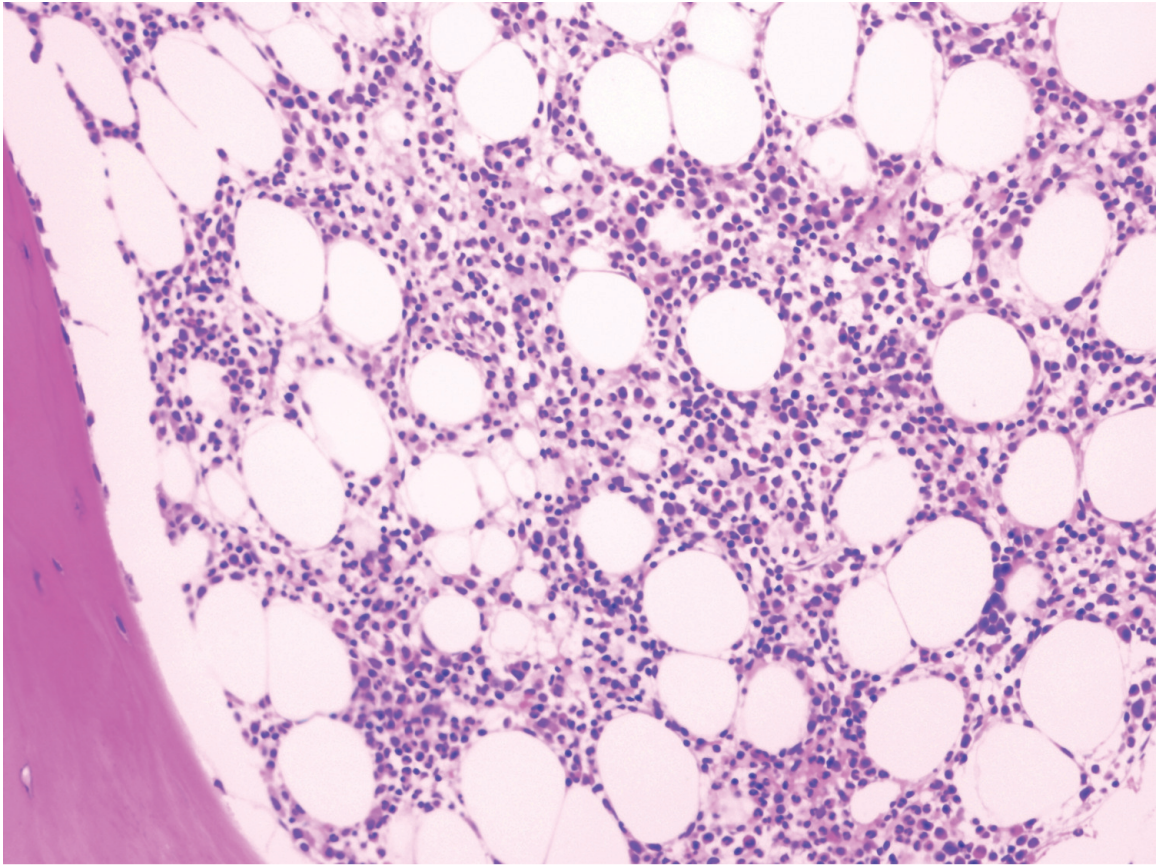

Supplement: what-kanani-1-at.pdf [file what-kanani-1-at.pdf]
